# Supplementary figures and images for: Hybrid metal-dielectric gratings (HMDGs) as an alternative UV-SERS substrate
Source: Royal Society of Chemistry journal article supplement (doi:10.1039/d3cp01911j), 2023-01-01

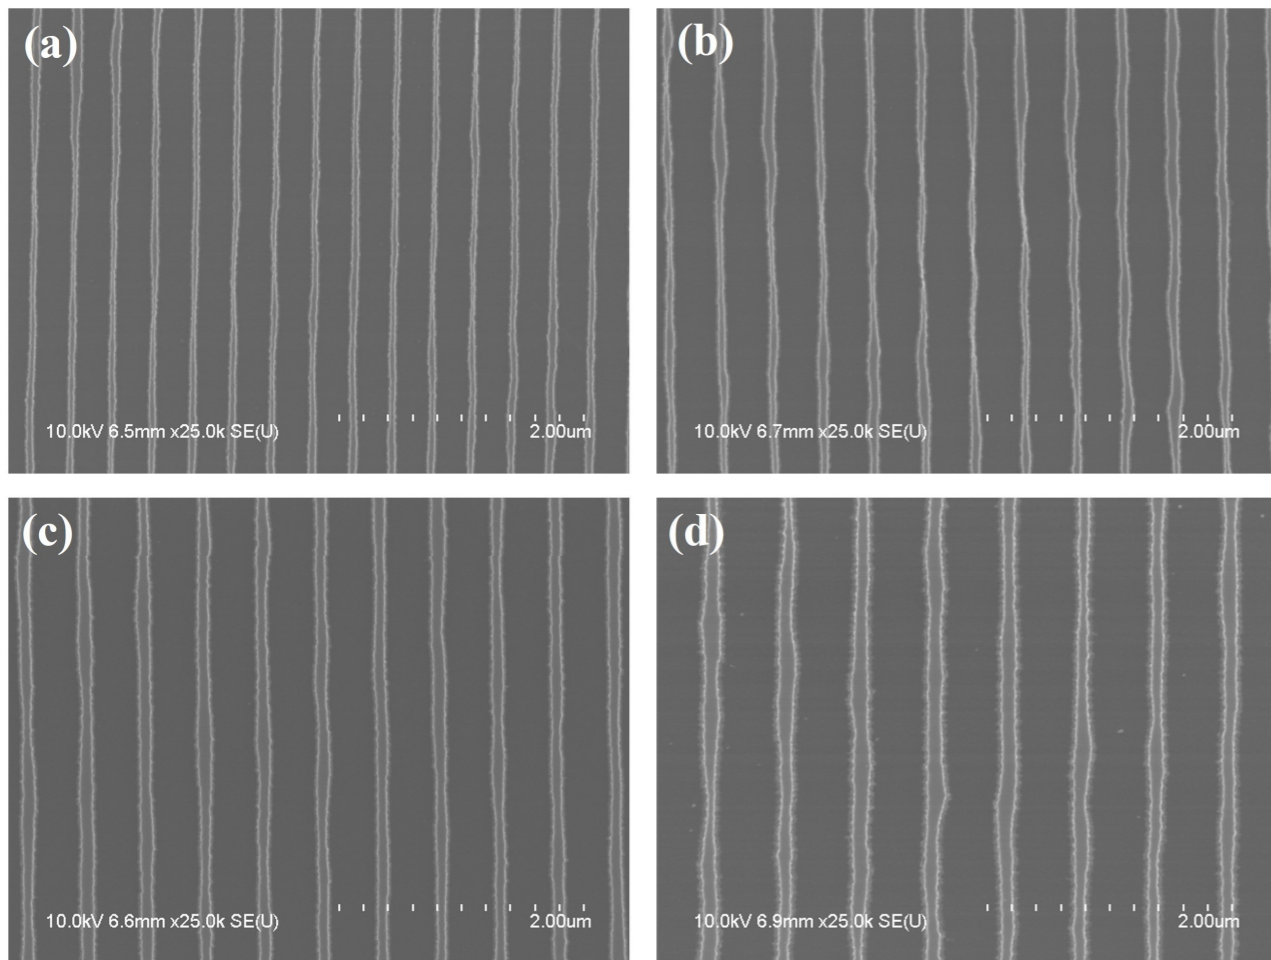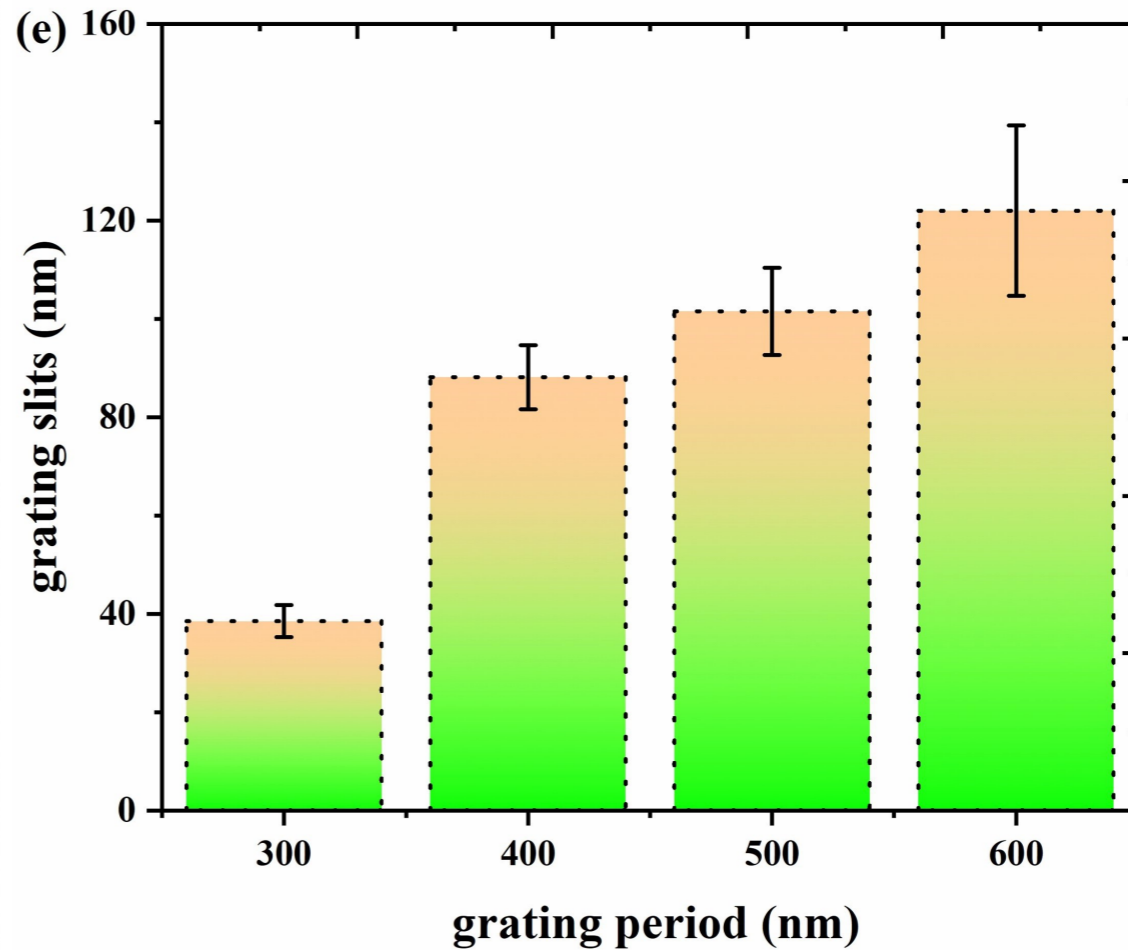

Supplement: d3cp01911j2.pdf [file d3cp01911j2.pdf]

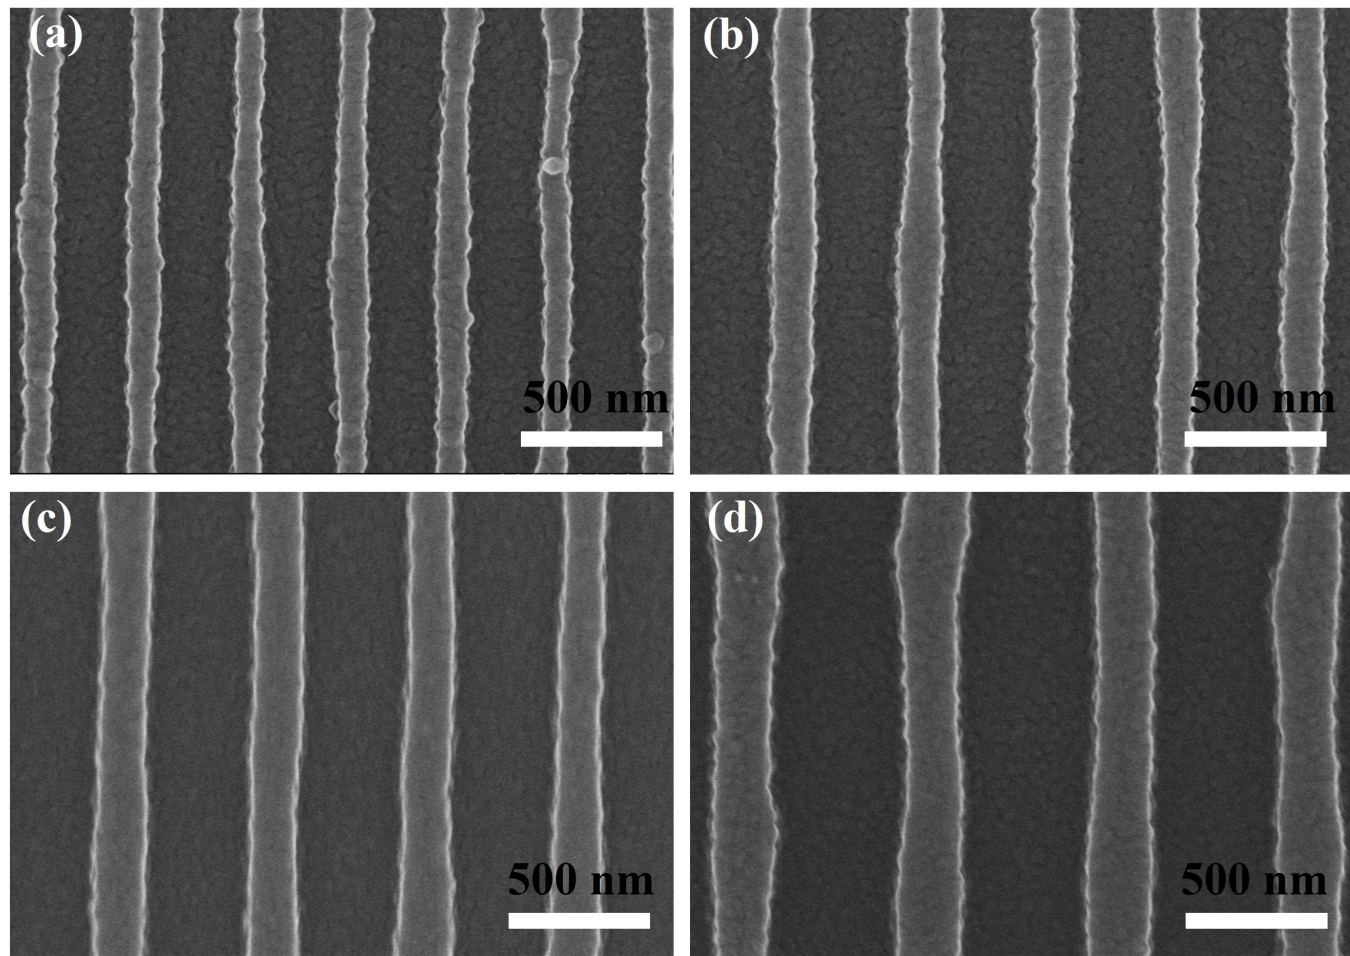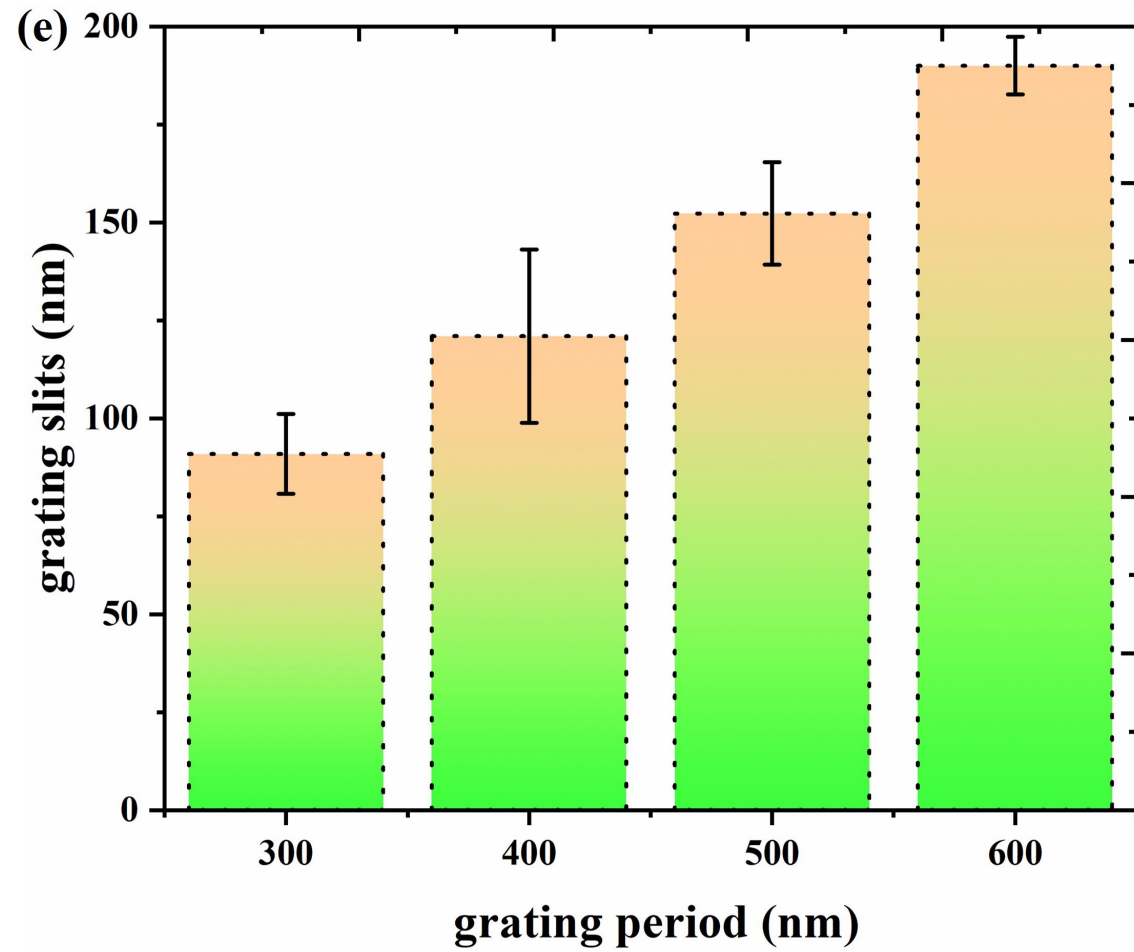

Supplement: d3cp01911j3.pdf [file d3cp01911j3.pdf]

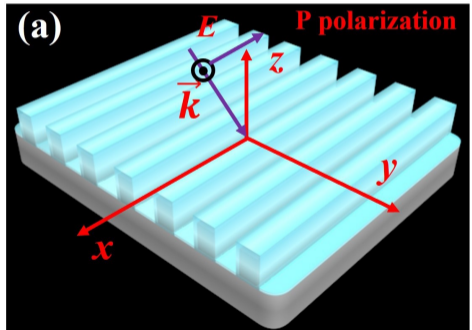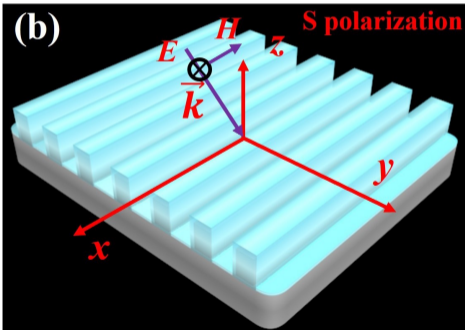

Supplement: d3cp01911j4.pdf [file d3cp01911j4.pdf]

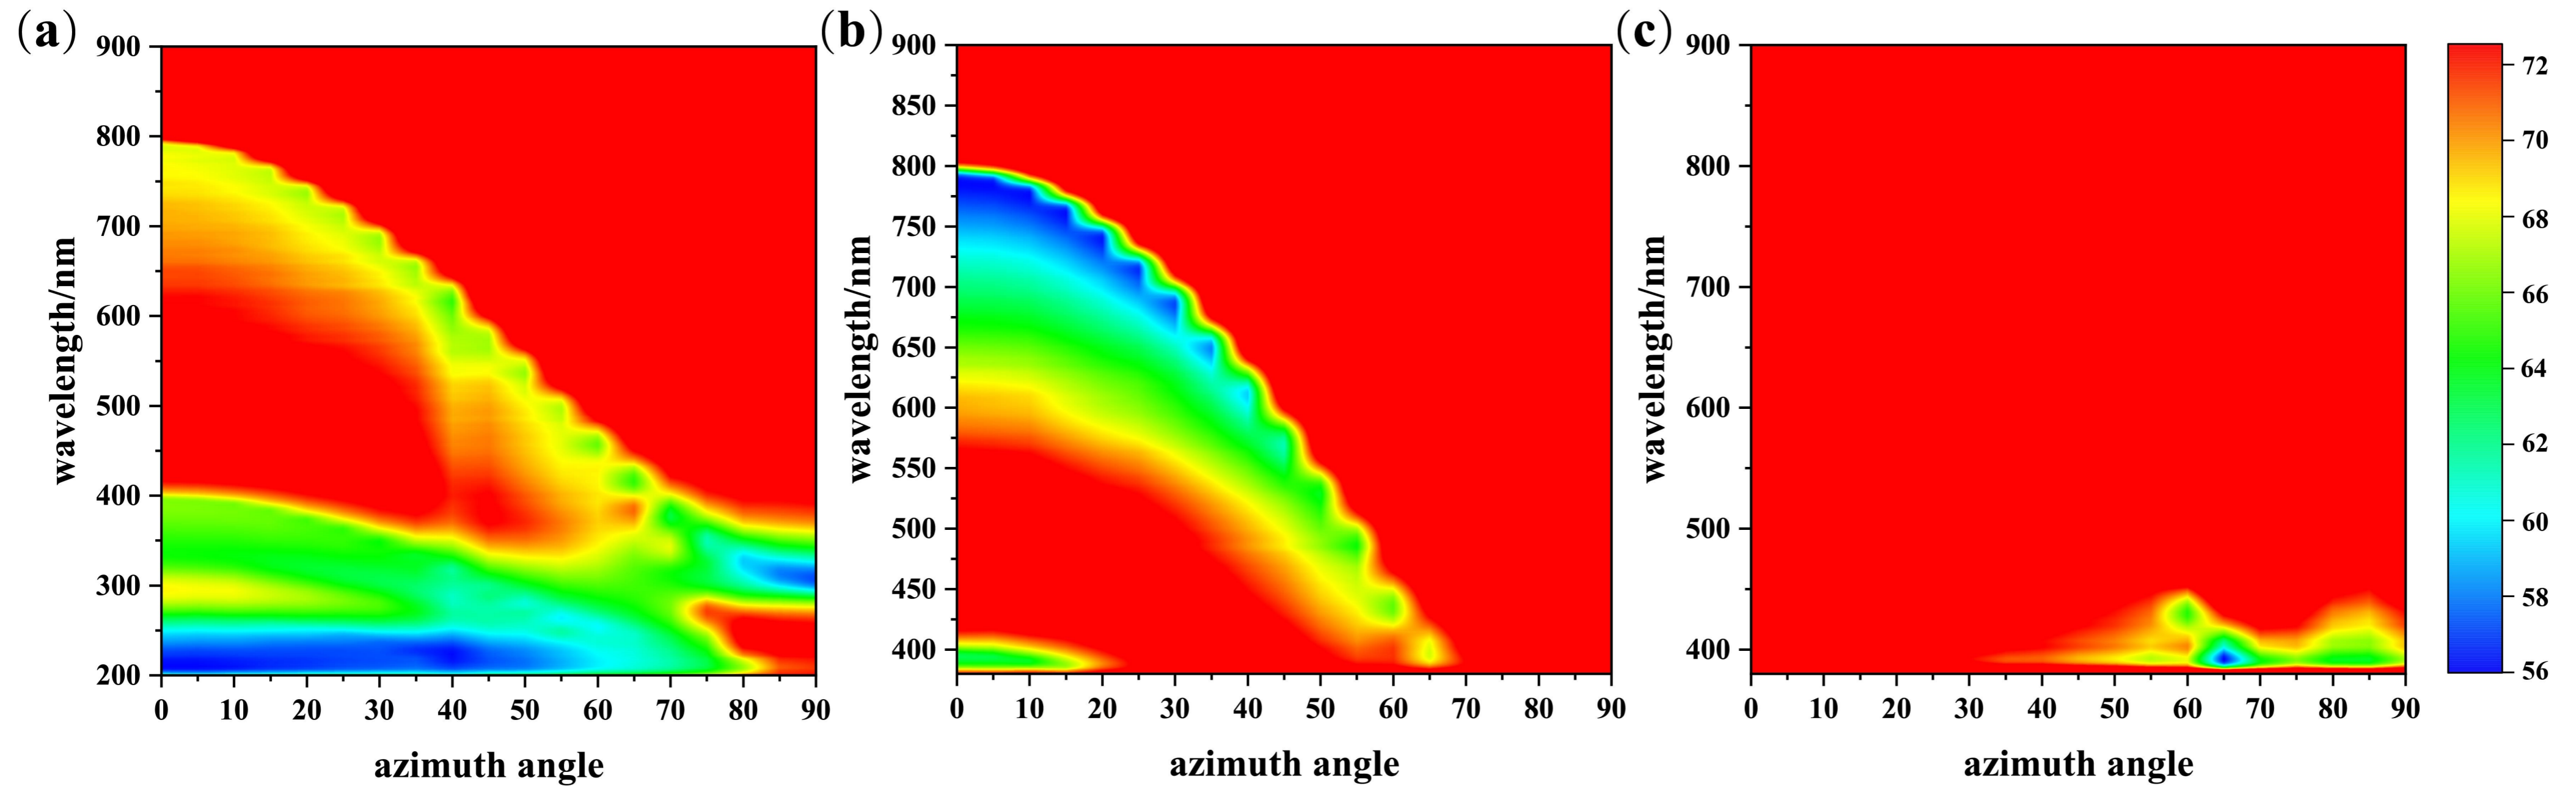

Supplement: d3cp01911j5.pdf [file d3cp01911j5.pdf]
